# Supplementary material for: Neurotransmitter-stimulated neuron-derived sEVs have opposite effects on amyloid β-induced neuronal damage
Source: PubMed Central journal article supplement (PMC8518222; doi:10.1186/s12951-021-01070-5), 2021-10-15

**A**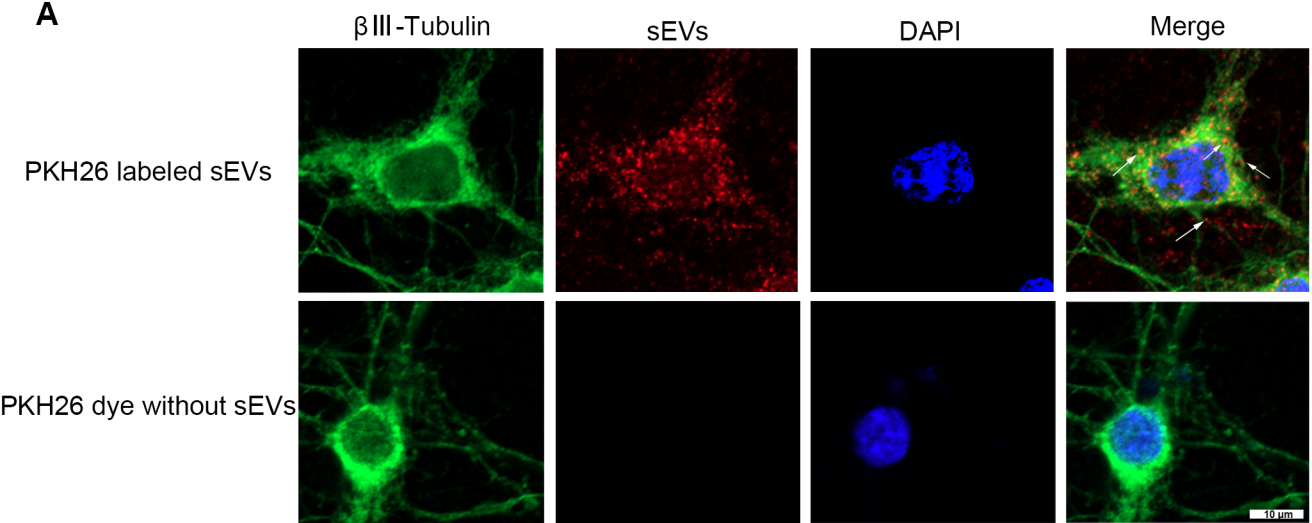

Supplement: 12951_2021_1070_MOESM2_ESM.pdf [file 12951_2021_1070_MOESM2_ESM.pdf]
