# Supplementary material for: Neurotransmitter-stimulated neuron-derived sEVs have opposite effects on amyloid β-induced neuronal damage
Source: PubMed Central journal article supplement (PMC8518222; doi:10.1186/s12951-021-01070-5), 2021-10-15

**A** Up-regulated miRNAs  
(GABA sEVs vs Ctrl sEVs)

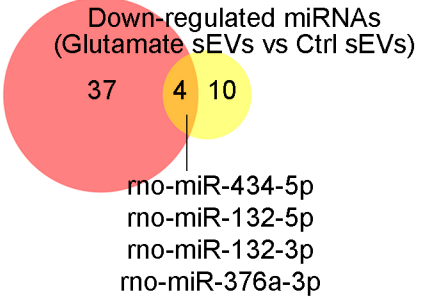

- rno-miR-434-5p
- rno-miR-132-5p
- rno-miR-132-3p
- rno-miR-376a-3p

**B** Down-regulated miRNAs  
(GABA sEVs vs Ctrl sEVs)  
Up-regulated miRNAs  
(Glutamate sEVs VS Ctrl sEVs)

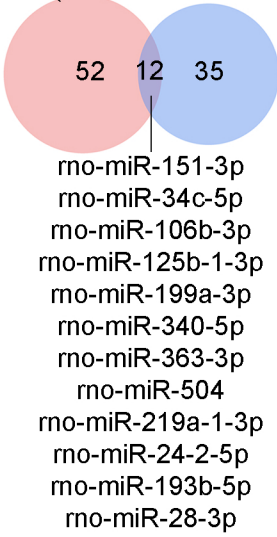

- rno-miR-151-3p
- rno-miR-34c-5p
- rno-miR-106b-3p
- rno-miR-125b-1-3p
- rno-miR-199a-3p
- rno-miR-340-5p
- rno-miR-363-3p
- rno-miR-504
- rno-miR-219a-1-3p
- rno-miR-24-2-5p
- rno-miR-193b-5p
- rno-miR-28-3p

**C**

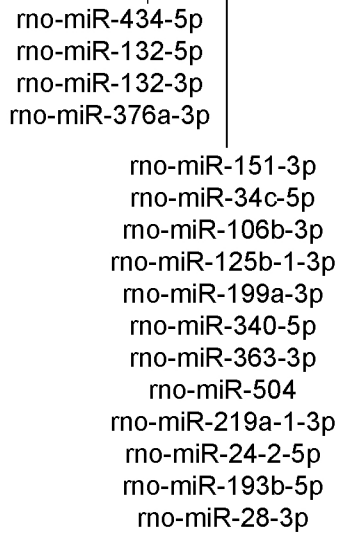

Supplement: 12951_2021_1070_MOESM5_ESM.pdf [file 12951_2021_1070_MOESM5_ESM.pdf]
